# Supplementary material for: Rose Bengal-photosensitized oxidation of 4-thiothymidine in aqueous medium: evidence for the reaction of the nucleoside with singlet state oxygen
Source: Royal Society of Chemistry journal article supplement (doi:10.1039/c5cp03615a), 2015-01-01
Supplement: c5cp03615a1.pdf [file c5cp03615a1.pdf]

## Supporting Information

### **Rose Bengal-photosensitized oxidation of 4-thiothymidine in aqueous medium: evidence for the reaction of the nucleoside with singlet state oxygen**

Vito Rizzi<sup>a</sup>, Ilario Losito<sup>a,b</sup>, Andrea Ventrella<sup>a</sup>, Paola Fini<sup>c</sup>, Aurore Fraix<sup>d</sup>, Salvatore Sortino<sup>d</sup>,  
Angela Agostiano<sup>a,c</sup>, Francesco Longobardi<sup>a</sup> and Pinalysa Cosma<sup>a, c,\*</sup>.

<sup>a</sup> *Università degli Studi “Aldo Moro” di Bari, Dip. Chimica, Via Orabona, 4- 70126 Bari, Italy*  
*E-mail: [pinalysa.cosma@uniba.it](mailto:pinalysa.cosma@uniba.it)*

<sup>b</sup> *Centro Interdipartimentale SMART, Via Orabona, 4- 70126 Bari, Italy*

<sup>c</sup> *Consiglio Nazionale delle Ricerche CNR-IPCF, UOS Bari, Via Orabona, 4- 70126 Bari, Italy*

<sup>d</sup> *Laboratory of Photochemistry, Department of Drug Sciences, University of Catania, Viale Andrea Doria 6, I-95125 Catania, Italy*

*\*Corresponding Author: Pinalysa Cosma*

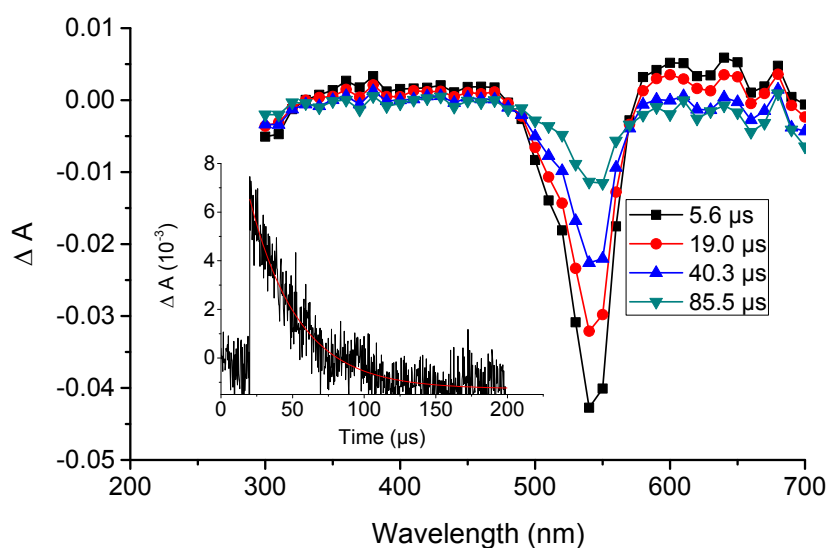

**Figure S1.** Transient absorption spectra recorded at different delay times with respect to 532 nm laser excitation of N<sub>2</sub>-saturated aqueous solutions of RB at pH 12 ( $E_{532} \sim 10$  mJ/ pulse, pulse with  $\approx 6$  ns). The inset shows the decay trace monitored at 600 nm and the related first-order fitting.

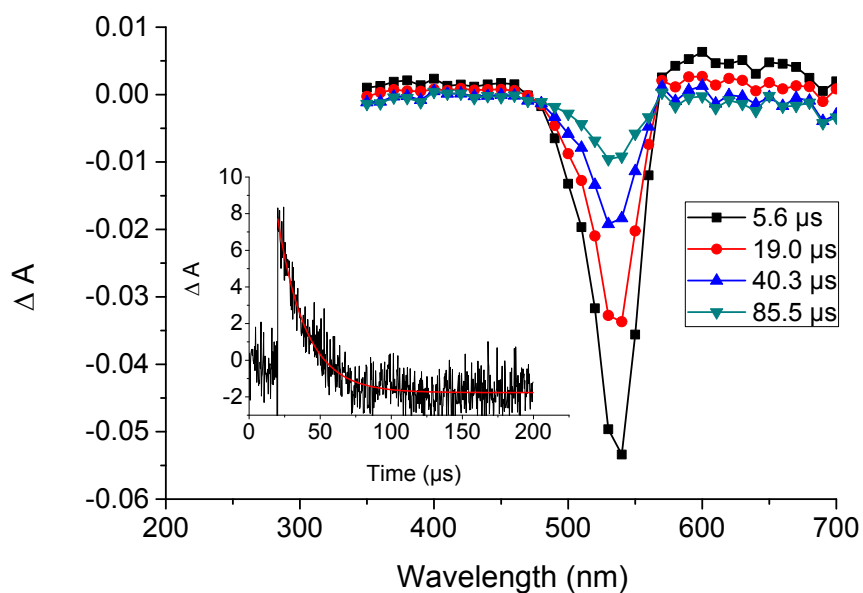

**Figure S2.** Transient absorption spectra recorded at different delay times with respect to 532 nm laser excitation of N<sub>2</sub>-saturated aqueous solutions of RB at pH 7 in the presence of S<sup>4</sup>TdR  $8 \times 10^{-4}$  M ( $E_{532} \sim 10$  mJ/ pulse, pulse with  $\approx 6$  ns). The inset shows the decay trace monitored at 600 nm and the related first-order fitting.

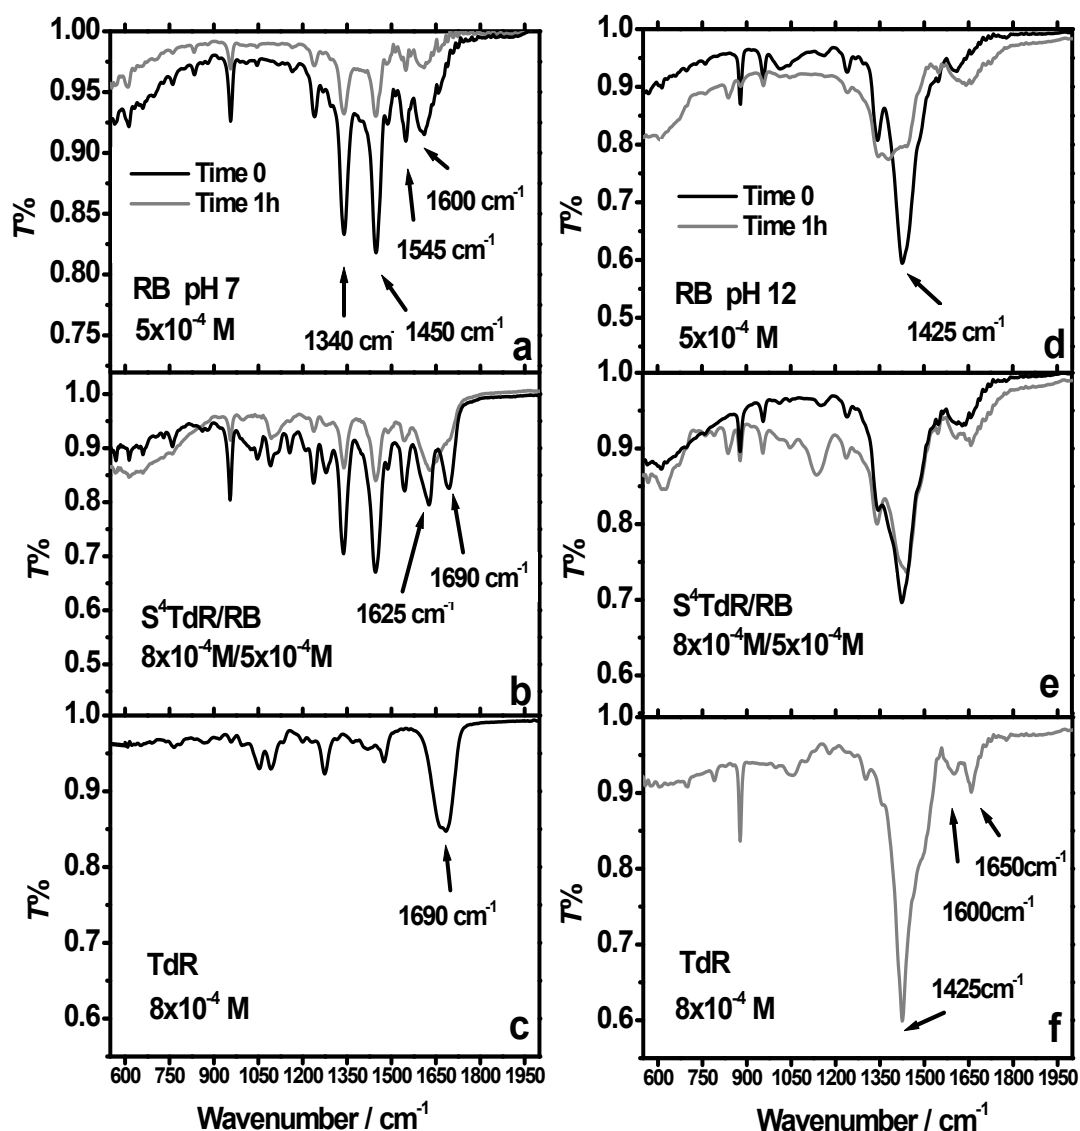

**Figure S3.** Comparison between detailed views (wavenumber range: 550-2000 cm<sup>-1</sup>) of the FTIR ATR spectra obtained for: **top panels**) a 5 × 10<sup>-4</sup> M solution of RB at pH 7 (a) and pH 12 (d), before (black line) and after (dark gray line) irradiation for 1 hour with neon light (emission between 400 and 700 nm); **central panels**) a 8 × 10<sup>-4</sup> M solution of S<sup>4</sup>TdR in the presence of RB 5 × 10<sup>-4</sup> M at pH 7 (b) and 12 (e), before (black line) and after (dark gray line) irradiation; **bottom panels**) a 8 × 10<sup>-4</sup> M solution of TdR at pH 7 (c) and 12 (f). See text for details about the assignment of bands emphasized in the figure.

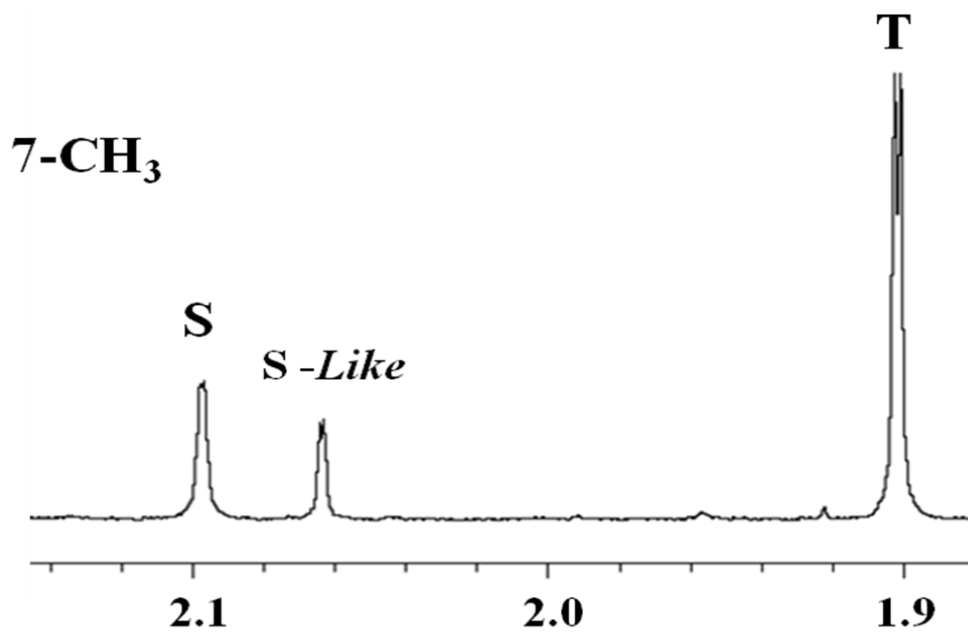

**Figure S4.** Detailed view (2.14-1.9 ppm) of the <sup>1</sup>H-NMR spectrum obtained for the reaction mixture containing  $2 \times 10^{-4}$  M S<sup>4</sup>TdR and  $5 \times 10^{-4}$  M RB at pH 7 after 1 h of irradiation with neon light (emission between 400 and 700 nm). Signals related to the 7-CH<sub>3</sub> protons of 4-thiothymidine (S), thymidine (T) and dimeric 4-thiothymidine (*S-Like*) are evidenced.

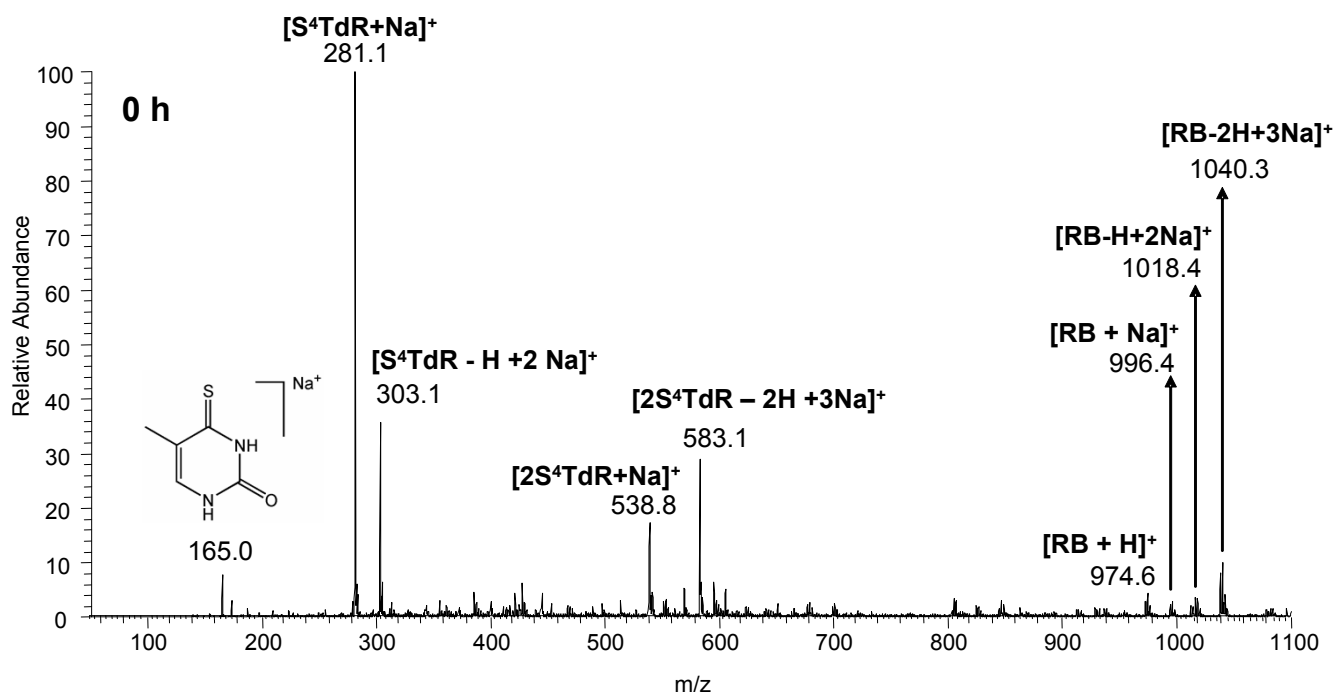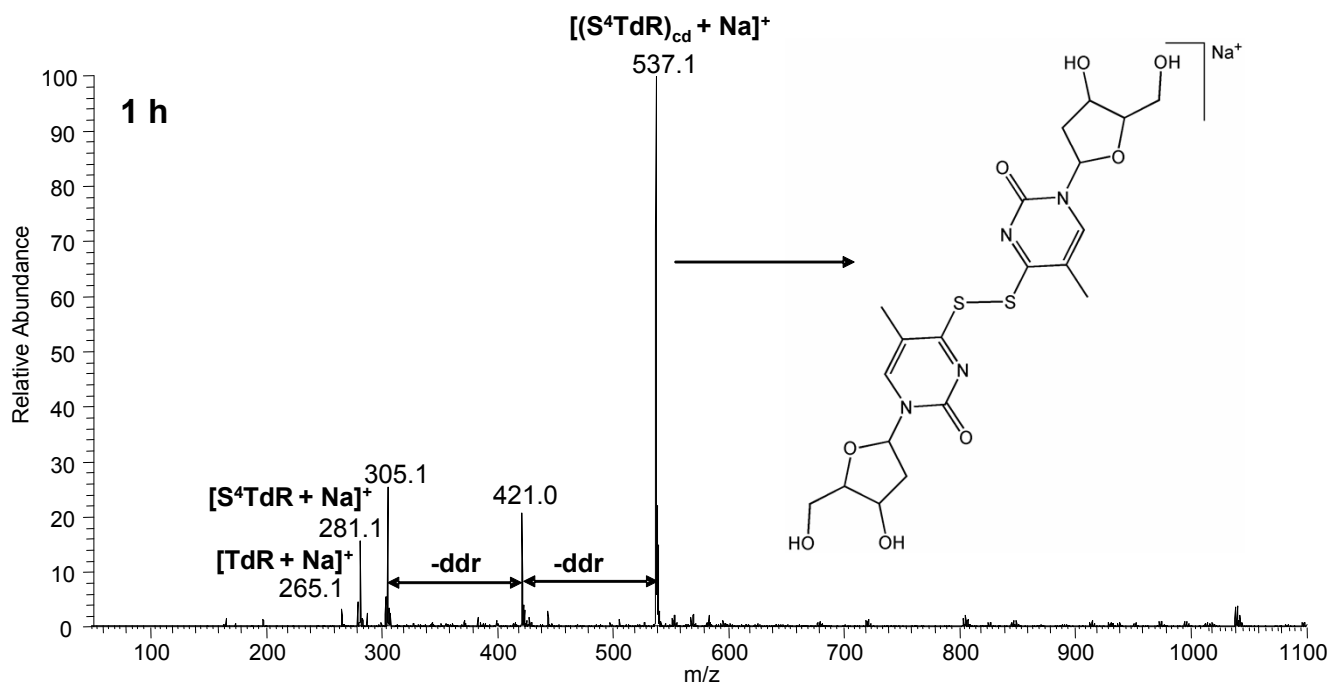

**Figure S5.** Comparison between ESI-MS positive ion spectra obtained for an aqueous solution containing  $S^4TdR$   $2 \times 10^{-4}$  M and RB  $5 \times 10^{-4}$  M at pH 7 before (0 h) and after irradiation for 1 h with neon light (emission between 400 and 700 nm). See the text for details about peak assignments. Legend: -ddr = dehydro-deoxyribose neutral loss.
